# Supplementary material for: Catalytic asymmetric epoxidation of aliphatic enones using tartrate-derived magnesium alkoxidesElectronic supplementary information (ESI) available: conditions for enantiomeric purity determination for epoxyketones derived by di-tert-butyl tartrate mediated epoxidation. See http://www.rsc.org/suppdata/cc/b1/b109421a/
Source: Royal Society of Chemistry journal article supplement (doi:10.1039/b109421a), 2001-11-27
Supplement: b109421a.pdf [file b109421a.pdf]

**Supporting Information**  
**Catalytic Asymmetric Epoxidation of Aliphatic Enones using Tartrate-derived Magnesium Alkoxides**

Olivier Jacques, Sarah J. Richards and Richard F.W. Jackson

**Conditions for Enantiomeric Purity Determination for Epoxyketones derived by Di-*tert*-butyl Tartrate mediated Epoxidation**

**(3*R*,4*S*)-1-(3-Butyl-oxiranyl)-ethanone 2a**

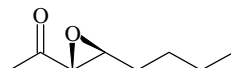

$[\alpha]_D +45.3$  (c 1.06 in  $\text{CHCl}_3$ ); The absolute configuration was derived from that observed for *trans*-(3*R*,4*S*)-epoxynonan-2-one based on the assumption of a uniform reaction mechanism. Analysis by chiral phase GC indicated  $R_t$  (3*S*, 4*R*) 9.84 min and  $R_t$  (3*R*, 4*S*) 10.41 min, heptakis(2,6-di-*O*-methyl-3-*O*-pentyl)-*b*-cyclodextrin, 100 °C isothermal, indicated 91% ee.

**(3*R*,4*S*)-1-(3-Pentyl-oxiranyl)-ethanone 2b**

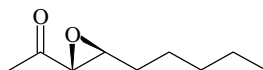

$[\alpha]_D +43.9$  (c 1.14 in  $\text{CHCl}_3$ ) (lit.<sup>1</sup>  $[\alpha]_D^{25} -38.7$ , (c 0.75 in  $\text{CHCl}_3$ ), 91 % ee). The absolute configuration was determined by comparing the measured optical rotation with the reported one for *trans*-(3*S*,4*R*)-epoxy-nonan-2-one. Analysis by chiral phase GC indicated  $R_t$  (3*S*, 4*R*) 11.59 min and  $R_t$  (3*R*, 4*S*) 12.16 min, heptakis(2,6-di-*O*-methyl-3-*O*-pentyl)-*b*-cyclodextrin, 110 °C isothermal, indicated 93% ee.

**Preparation of (3*R*,4*S*)-1-(3-Hexyl-oxiranyl)-ethanone 2c**

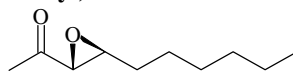

$[\alpha]_D +34.8$ , (c 1.01 in  $\text{CHCl}_3$ ). The absolute configuration was derived from *trans*-(3*R*,4*S*)-epoxy nonan-2-one based on the assumption of a uniform reaction mechanism.. Analysis by chiral phase GC  $R_t$  (3*S*, 4*R*) 12.74 min and  $R_t$  (3*R*, 4*S*) 13.17, heptakis(2,6-di-*O*-methyl-3-*O*-pentyl)-*b*-cyclodextrin, 120 °C isothermal, indicated 92% ee.

**Preparation of (3*R*,4*S*)-1-(3-methyl-oxiranyl)-propan-1-one 2d**

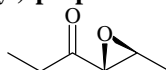

$[\alpha]_D +43.6$  (c 0.55 in  $\text{CHCl}_3$ ). Analysis by chiral phase GC  $R_t$  (3*S*, 4*R*) 7.9 min and  $R_t$  (3*R*, 4*S*) 8.5 min, heptakis(2,6-di-*O*-methyl-3-*O*-pentyl)-*b*-cyclodextrin, 74 °C isothermal, indicated 77% ee.

**Preparation of (3*R*,4*S*)-1-[3-(3,5-Dibromo-phenyl)-oxiranyl]-ethanone 2e**

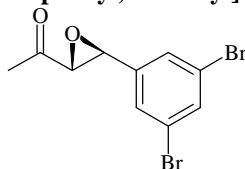

Mpt 78-82 °C, ee 80%,  $[\alpha]_D -73.1$  (c 1.01 in  $\text{CHCl}_3$ ). Enantiomeric excess was determined by chiral stationary phase HPLC analysis (DAICEL CHIRALPAK AD, *i*-PrOH-hexane=5:95, flow rate 1 ml/min, 7.55 min (3*R*,4*S*) isomer and 11.58 min (3*S*,4*R*) isomer detection at 210 nm, indicated 81% ee. The absolute configuration was determined from the X-ray structure. The crystal used for the X-ray analysis was reanalysed by HPLC, and confirmed to be the major enantiomer.

1 M. Bougauchi, S. Watanabe, T. Arai, H. Sasai, and M. Shibasaki, *J. Am. Chem. Soc.*, 1997, **119**, 2329.
